# Supplementary material for: Negative thermal expansion triggered anomalous thermal upconversion luminescence behaviors in Er3+/Yb3+-codoped Y2Mo3O12 microparticles for highly sensitive thermometry
Source: Royal Society of Chemistry journal article supplement (doi:10.1039/d1ma00072a), 2021-01-01
Supplement: d1ma00072a1.pdf [file d1ma00072a1.pdf]

**Negative thermal expansion triggered anomalous thermal upconversion  
luminescence behaviors in Er<sup>3+</sup>/Yb<sup>3+</sup>-codoped Y<sub>2</sub>Mo<sub>3</sub>O<sub>12</sub> microparticles for high  
sensitive thermometry**

**Huocheng Lv, Peng Du\*, Laihui Luo and Weiping Li**

*Department of Microelectronic Science and Engineering, School of Physical Science and Technology, Ningbo  
University, 315211 Ningbo, Zhejiang, China*

Corresponding author:

E-mail: dp2007good@sina.com or dupeng@nbu.edu.cn (P. Du)

**Table S1.** Lattice parameters of Y<sub>2</sub>Mo<sub>3</sub>O<sub>12</sub>, Y<sub>2</sub>Mo<sub>3</sub>O<sub>12</sub>:Er<sup>3+</sup> and Y<sub>2</sub>Mo<sub>3</sub>O<sub>12</sub>:Er<sup>3+</sup>/0.22Yb<sup>3+</sup> microparticles.

| Parameter                 | Compounds                                      |                                                                  |                                                                                        |
|---------------------------|------------------------------------------------|------------------------------------------------------------------|----------------------------------------------------------------------------------------|
|                           | Y <sub>2</sub> Mo <sub>3</sub> O <sub>12</sub> | Y <sub>2</sub> Mo <sub>3</sub> O <sub>12</sub> :Er <sup>3+</sup> | Y <sub>2</sub> Mo <sub>3</sub> O <sub>12</sub> :Er <sup>3+</sup> /0.22Yb <sup>3+</sup> |
| Phase                     | Orthorhombic                                   | Orthorhombic                                                     | Orthorhombic                                                                           |
| <i>a</i>                  | 13.8688 Å                                      | 13.7371 Å                                                        | 13.6490 Å                                                                              |
| <i>b</i>                  | 9.9349 Å                                       | 9.9228 Å                                                         | 9.9261 Å                                                                               |
| <i>c</i>                  | 10.0216 Å                                      | 9.9512 Å                                                         | 10.0078 Å                                                                              |
| <i>V</i>                  | 1380.82 Å <sup>3</sup>                         | 1356.44 Å <sup>3</sup>                                           | 1355.85 Å <sup>3</sup>                                                                 |
| $\alpha = \beta = \gamma$ | 90°                                            | 90°                                                              | 90°                                                                                    |
| <i>R</i> <sub>wp</sub>    | -                                              | 5.47%                                                            | 5.14%                                                                                  |
| <i>R</i> <sub>p</sub>     | -                                              | 3.13%                                                            | 2.97%                                                                                  |
| GOF                       | -                                              | 1.75%                                                            | 1.73%                                                                                  |

**Table S2.** CIE coordinates and  $I_{\text{Green}}/I_{\text{Red}}$  value of the  $\text{Y}_2\text{Mo}_3\text{O}_{12}:\text{Er}^{3+}/0.22\text{Yb}^{3+}$  microparticles as a function of temperature.

| Temperature | Color coordinate |       | $I_{\text{Green}}/I_{\text{Red}}$ |
|-------------|------------------|-------|-----------------------------------|
|             | $x$              | $y$   |                                   |
| 303 K       | 0.274            | 0.705 | 13.27                             |
| 343 K       | 0.249            | 0.723 | 13.16                             |
| 383 K       | 0.237            | 0.732 | 14.45                             |
| 423 K       | 0.229            | 0.738 | 15.94                             |
| 463 K       | 0.228            | 0.739 | 16.59                             |
| 503 K       | 0.232            | 0.735 | 14.09                             |
| 543 K       | 0.233            | 0.733 | 13.81                             |
| 583 K       | 0.232            | 0.733 | 13.66                             |

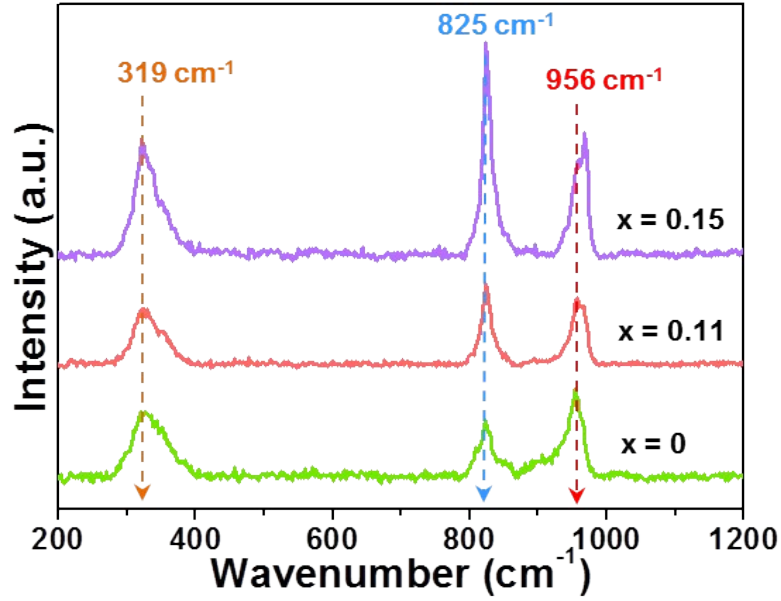

**Figure S1.** Raman spectra of the  $\text{Y}_2\text{Mo}_3\text{O}_{12}:\text{Er}^{3+}/2x\text{Yb}^{3+}$  ( $x = 0, 0.11, 0.15$ ) microparticles.

The Raman spectra of representative  $\text{Y}_2\text{Mo}_3\text{O}_{12}:\text{Er}^{3+}$ ,  $\text{Y}_2\text{Mo}_3\text{O}_{12}:\text{Er}^{3+}/0.22\text{Yb}^{3+}$  and  $\text{Y}_2\text{Mo}_3\text{O}_{12}:\text{Er}^{3+}/0.30\text{Yb}^{3+}$  compounds were measured to get deeper insight into the crystal structure of the studied samples, as shown in Fig. S1. It is seen that all the samples exhibit three featured bands at 319, 825 and 956  $\text{cm}^{-1}$  which coincide well with that of the previously reported orthorhombic  $\text{Y}_2\text{Mo}_3\text{O}_{12}$ .<sup>[1,2]</sup> Specially, the band at 319  $\text{cm}^{-1}$  is assigned to symmetric and asymmetric bending motions in both the  $\text{YO}_6$  octahedron and  $\text{MoO}_4$  tetrahedron, whereas the peaks at 825 and 956  $\text{cm}^{-1}$  are ascribed to symmetric and asymmetric stretching vibrations of the  $\text{MoO}_4$  tetrahedra, respectively. Notably, although a secondary phase is observed in the resultant samples when the doping content is 15 mol%, only the Raman modes of orthorhombic  $\text{Y}_2\text{Mo}_3\text{O}_{12}$  are seen. This is because that the content of the impurity phase in the prepared is very low.

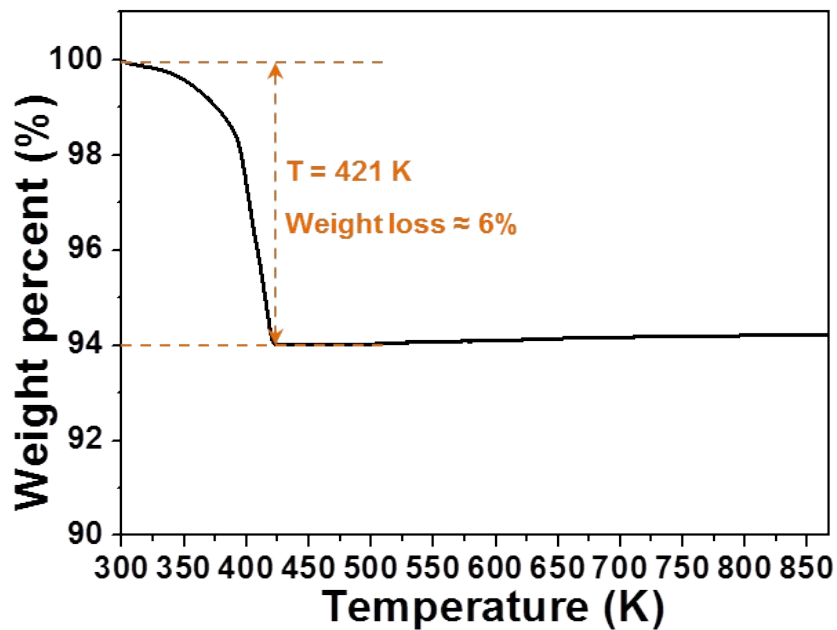

**Figure S2.** TG spectrum of the  $\text{Y}_2\text{Mo}_3\text{O}_{12}:\text{Er}^{3+}/0.22\text{Yb}^{3+}$  microparticles.

The thermal stability of the studied samples is confirmed by using a TG spectrum. As shown in Fig. S2, one knows that the weight of the samples decrease slowly when the temperature bellows 393 K due to the release of the crystal water which shows weak interaction with  $\text{Y}_2\text{Mo}_3\text{O}_{12}$ , while it declines sharply when the temperature is over 393 K because of the release of the crystal water with strong interaction with host,<sup>[3]</sup> leading to a mass decrease of around 6% at 421 K. Clearly, with further increasing the temperature, the mass of the samples do not show any changes. These results suggest that the prepared samples have splendid thermal stability.

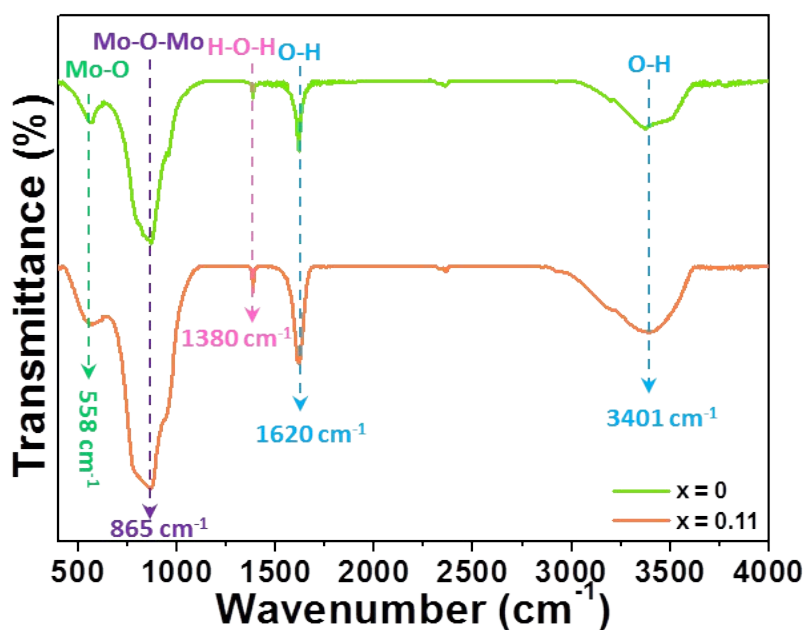

**Figure S3.** FT-IR spectra of the  $\text{Y}_2\text{Mo}_3\text{O}_{12}:\text{Er}^{3+}$  and  $\text{Y}_2\text{Mo}_3\text{O}_{12}:\text{Er}^{3+}/0.22\text{Yb}^{3+}$  microparticles.

The surface properties of the final products are verified by using the FT-IR spectrum. The FT-IR spectra of the  $\text{Y}_2\text{Mo}_3\text{O}_{12}:\text{Er}^{3+}$  and  $\text{Y}_2\text{Mo}_3\text{O}_{12}:\text{Er}^{3+}/0.22\text{Yb}^{3+}$  microparticles are shown in Fig. S3. As disclosed, the bands centered at  $3401$  and  $1620 \text{ cm}^{-1}$  corresponding to the stretching vibration of O-H, whereas the peak at  $1380 \text{ cm}^{-1}$  is attributed to the H-O-H stretching vibration.<sup>[4]</sup> Furthermore, the band at  $865 \text{ cm}^{-1}$  is attributed to the Mo-O-Mo vibration mode and the peak located at  $538 \text{ cm}^{-1}$  is due to the vibration of Mo-O mode.<sup>[5]</sup>

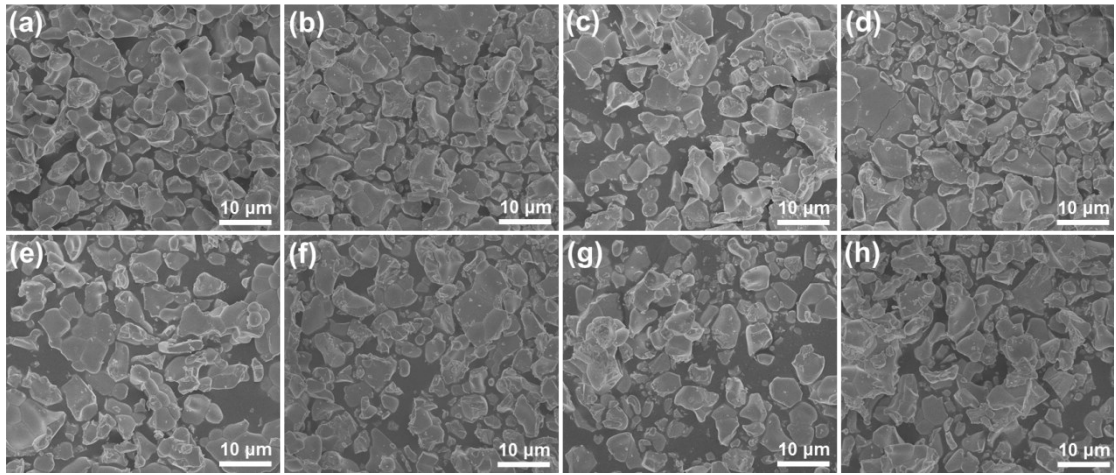

**Figure S4.** FE-SEM images of the  $\text{Y}_2\text{Mo}_3\text{O}_{12}:\text{Er}^{3+}/2x\text{Yb}^{3+}$  microparticles with the doping content of (a)  $x = 0$ , (b)  $x = 0.03$ , (c)  $x = 0.05$ , (d)  $x = 0.07$ , (e)  $x = 0.09$ , (f)  $x = 0.11$ , (g)  $x = 0.13$  and (h)  $x = 0.15$ .

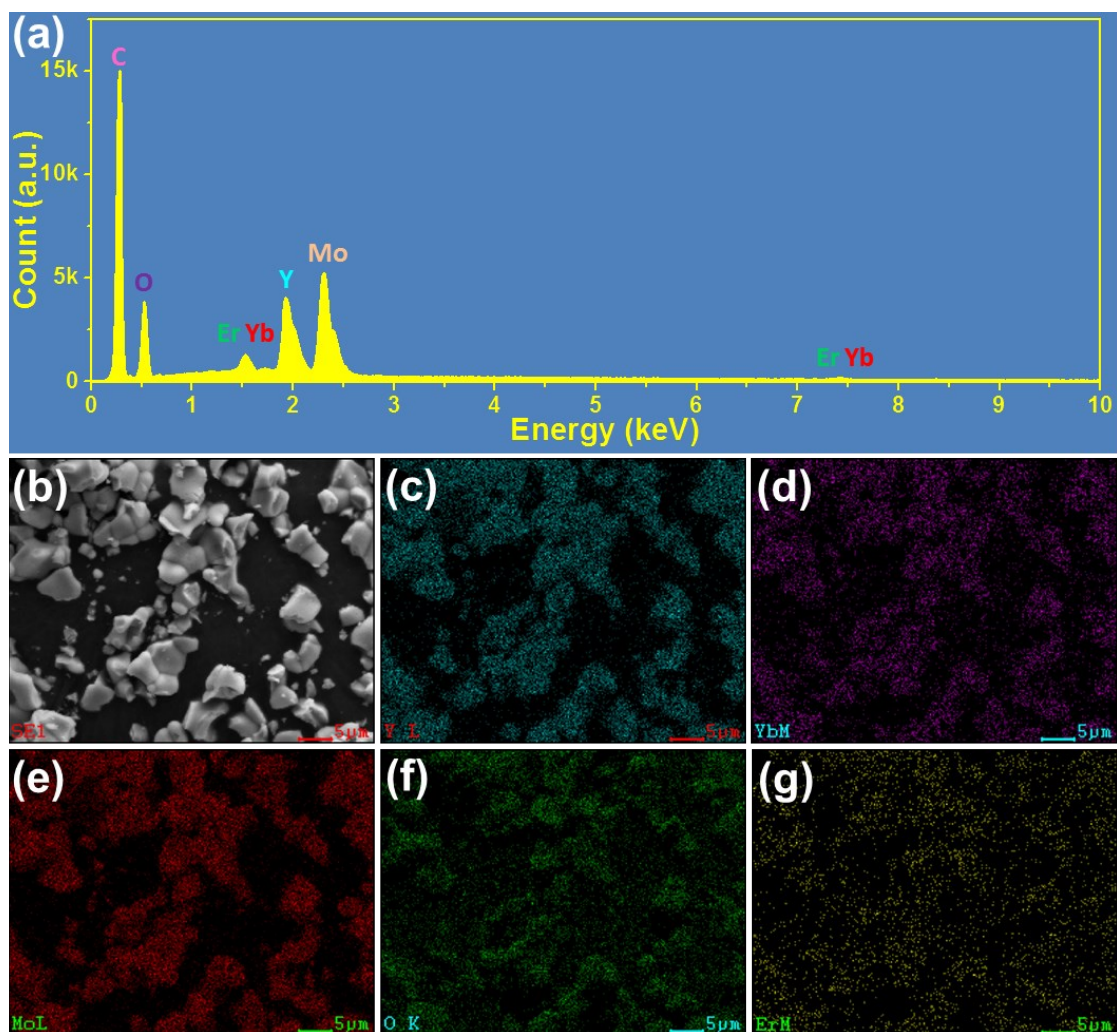

**Figure S5.** (a) EDS spectrum, (b) FE-SEM image and (c)-(g) Elemental mapping of the  $\text{Y}_2\text{Mo}_3\text{O}_{12}:\text{Er}^{3+}/0.22\text{Yb}^{3+}$  microparticles.

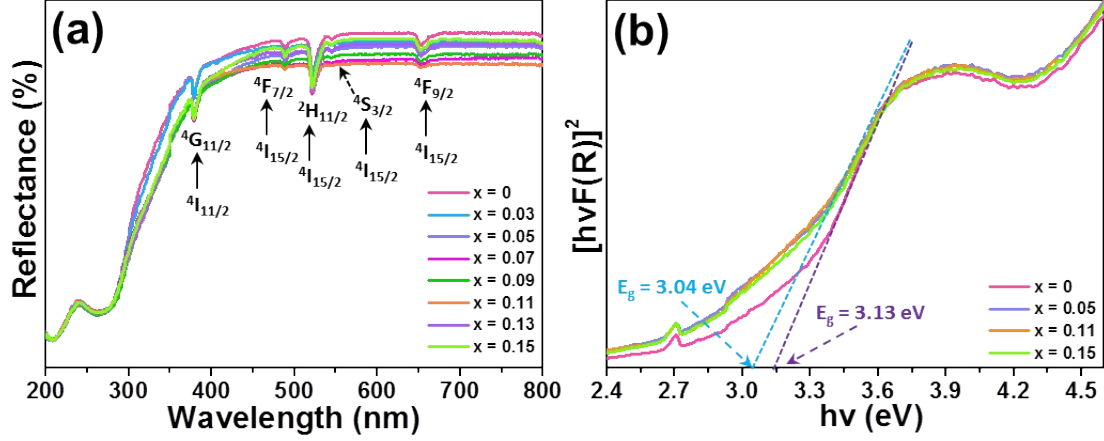

**Figure S6.** (a) Diffuse reflectance spectra of the  $\text{Y}_2\text{Mo}_3\text{O}_{12}:\text{Er}^{3+}/2x\text{Yb}^{3+}$  microparticles. (b) Evaluation of the optical band gap of the  $\text{Y}_2\text{Mo}_3\text{O}_{12}:\text{Er}^{3+}/2x\text{Yb}^{3+}$  microparticles *via* the Kubelka-Munk function.

The diffuse reflectance spectra of the  $\text{Y}_2\text{Mo}_3\text{O}_{12}:\text{Er}^{3+}/2x\text{Yb}^{3+}$  microparticles in the wavelength range of 200-800 nm were recorded and shown in Fig. S6(a). Significantly, aside from the broad intense absorption band in the range of 200-400 nm arising from the host, there are also five sharp bands originating from the  $\text{Er}^{3+}$  ions. Specially, these absorption bands at 378, 488, 522, 547 and 652 nm are ascribed to the  $^4\text{I}_{11/2} \rightarrow ^4\text{G}_{11/2}$ ,  $^4\text{I}_{15/2} \rightarrow ^4\text{F}_{7/2}$ ,  $^4\text{I}_{15/2} \rightarrow ^4\text{H}_{11/2}$ ,  $^4\text{I}_{15/2} \rightarrow ^4\text{S}_{3/2}$  and  $^4\text{I}_{15/2} \rightarrow ^4\text{F}_{9/2}$  transitions of  $\text{Er}^{3+}$  ions, respectively.<sup>[6]</sup> Furthermore, the optical band gap ( $E_g$ ) of the studied samples can be estimated by using the following expressions:<sup>[7,8]</sup>

$$\alpha hv = A(hv - E_g)^n, \quad (1)$$

$$F(R) = \frac{(1 - R)^2}{2R} = \frac{k}{s}, \quad (2)$$

$$[hvF(R)]^{1/n} = B(hv - E_g) \quad (3)$$

where  $\alpha$  is the absorption factor,  $hv$  denotes the photon energy,  $n = 1/2, 2, 3/2$  and  $3$  shows the direct, allowed indirect, forbidden direct and forbidden indirect electron transition, respectively,  $A$  and  $B$  refer to the coefficients. Consequently, the  $E_g$  values of the studied compounds can be achieved when  $[hvF(R)]^{1/n} = 0$ . As revealed in Fig. S6(b), when  $n = 1/2$ , the fitting results are the best and the optical band gap of the  $\text{Y}_2\text{Mo}_3\text{O}_{12}:\text{Er}^{3+}/2x\text{Yb}^{3+}$  microparticles were decided to be around 3.13, 3.04, 3.04 and



3.06 eV, respectively, when the  $x$  value is 0, 0.05, 0.11 and 0.15. These results suggest that the doping of  $\text{Yb}^{3+}$  ions has little impact on the optical band gap of the  $\text{Y}_2\text{Mo}_3\text{O}_{12}$  host.

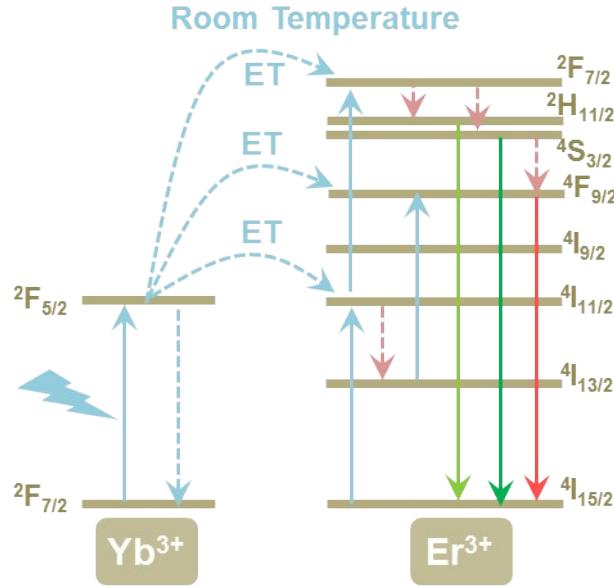

**Figure S7.** Energy level diagram of the  $\text{Er}^{3+}$  and  $\text{Yb}^{3+}$  ions as well as the proposed ET processes at room temperature.

The simplified energy level diagram of  $\text{Er}^{3+}$  and  $\text{Yb}^{3+}$  is drawn to explain the UC mechanism in the studied samples, as shown in Fig. S7. Since the  $\text{Yb}^{3+}$  ions have strong absorption in the near-infrared light and the can efficiently transfer the energy to the  $\text{Er}^{3+}$  ions, only the energy transfer (ET) from  $\text{Yb}^{3+}$  to  $\text{Er}^{3+}$  ions is discussed in present work. As shown, when the samples are excited by 980 nm, the  ${}^2\text{F}_{7/2}$  level of  $\text{Yb}^{3+}$  ions will be pumped to the  ${}^2\text{F}_{5/2}$  level. Then the energy will be transferred to the  $\text{Er}^{3+}$  ions, resulting in the generation of  ${}^4\text{I}_{11/2}$  level. At the same time, the second ET from  $\text{Yb}^{3+}$  to  $\text{Er}^{3+}$  occurs (*i.e.*,  ${}^4\text{I}_{11/2}(\text{Er}^{3+}) + {}^2\text{F}_{5/2}(\text{Yb}^{3+}) \rightarrow {}^2\text{F}_{7/2}(\text{Er}^{3+}) + {}^2\text{F}_{7/2}(\text{Yb}^{3+})$ ) and part of the electrons located at  ${}^4\text{I}_{11/2}$  level will be excited to  ${}^2\text{F}_{7/2}$  level. Afterwards, the non-radiative (NR) transition takes place and the excited levels of  ${}^2\text{H}_{11/2}$  and  ${}^4\text{S}_{3/2}$  are generated. As a result, the intense green UC emissions are formed owing to the radiative transitions of  ${}^2\text{H}_{11/2} \rightarrow {}^4\text{I}_{15/2}$  and  ${}^4\text{S}_{3/2} \rightarrow {}^4\text{I}_{15/2}$ . In contrast, there are two routes to generate the excited levels of  ${}^4\text{F}_{9/2}$ . As disclosed in Fig. S7, the  ${}^4\text{F}_{9/2}$  level is

able to be directly generated from  $^4S_{3/2}$  level through the NR transition process. Furthermore, it is worth nothing that electrons at  $^4I_{11/2}$  level can also decay to the level of  $^4I_{13/2}$  apart from taking part in the generation of  $^2F_{7/2}$  level. As for the  $^4I_{13/2}$  level, it can be excited to the  $^4F_{9/2}$  level through the ET process from  $Yb^{3+}$  to  $Er^{3+}$  ions. Owing to these two processes, the  $^4F_{9/2}$  level is generated, leading to the red UC emissions ( $^4F_{9/2} \rightarrow ^4I_{15/2}$ ) of  $Er^{3+}$  ions.

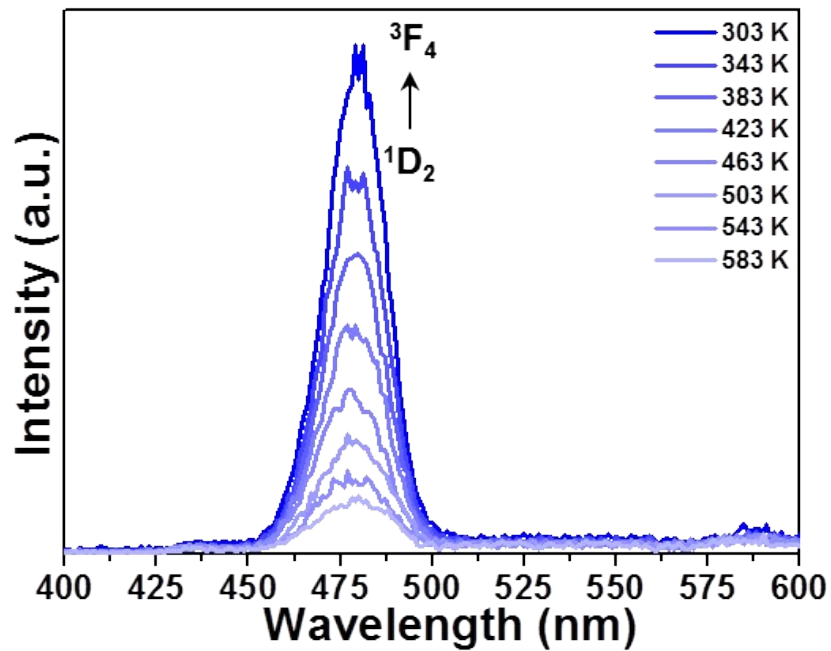

**Figure S8.** UC emission spectra of the BiOF:Er<sup>3+</sup>/Yb<sup>3+</sup> phosphors as a function of temperature excited at 980 nm.

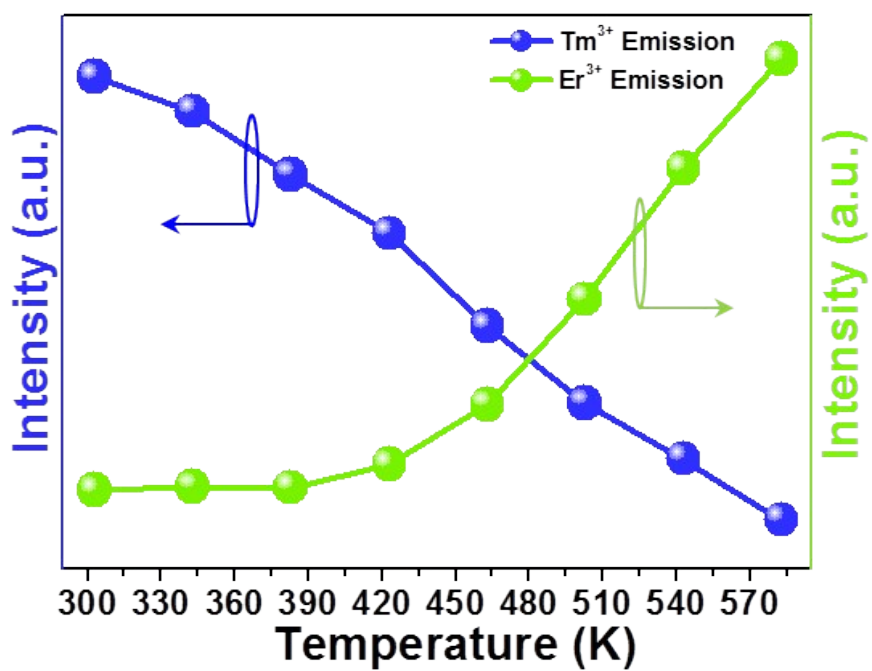

**Figure S9.** Temperature-dependent emission intensities of Tm<sup>3+</sup> (*i.e.*,  $^1G_4 \rightarrow ^3H_6$ ) and Er<sup>3+</sup> (*i.e.*,  $^2H_{11/2} \rightarrow ^4I_{15/2}$  and  $^4S_{3/2} \rightarrow ^4I_{15/2}$ ) ions in the designed composites.

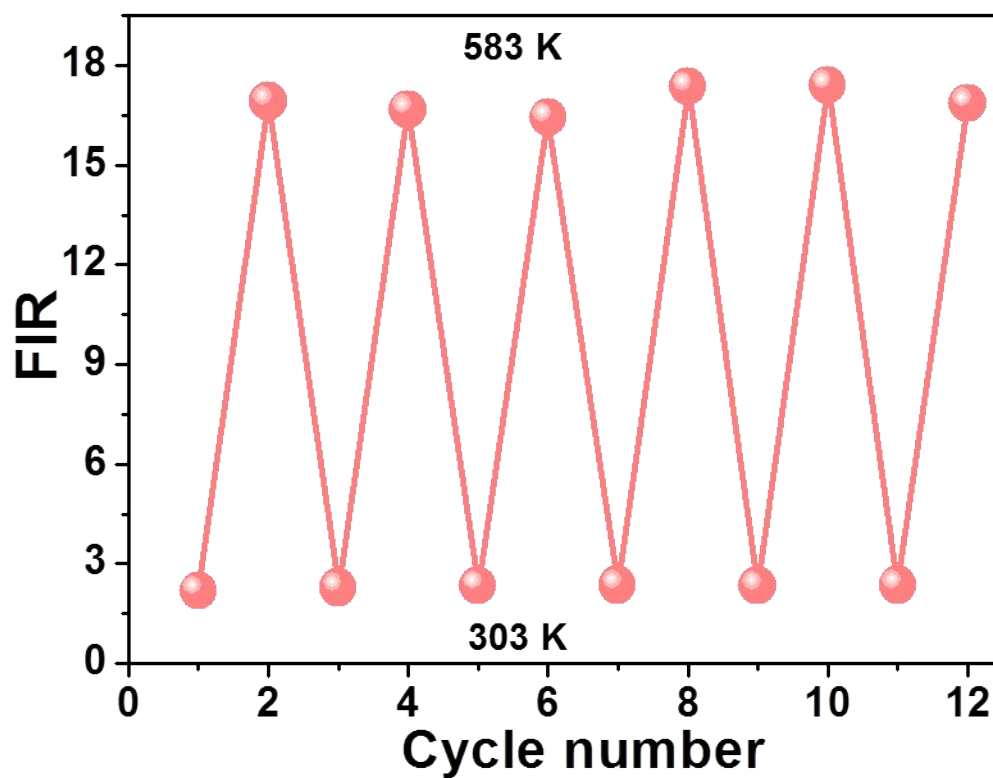

**Figure S10.** Temperature-induced switching of FIR values of the  $\text{Y}_2\text{Mo}_3\text{O}_{12}:\text{Er}^{3+}/0.22\text{Yb}^{3+}@\text{BiOF}:\text{Tm}^{3+}/\text{Yb}^{3+}$  composites in range of 303-583 K.

## Reference

1. X. Liu, Y. Cheng, E. Liang, M. Chao, *Phys. Chem. Chem. Phys.* **2014**, 16, 12848-12857.
2. A. C. T. Dias, C. L. Lima, W. Paraguassu, K. P. Silva, P. T. C. Freire, J. M. Filhoa, B. A. Marinkovic, K. J. Miller, M. A. White, A. G. S. Filho, *Vib. Spectros.* **2013**, 68, 251-256.
3. Y. G. Cheng, X. S. Liu, W. B. Song, B. H. Yuan, X. L. Wang, M. J. Chao, E. J. Liang, *Mater. Res. Bull.* **20105**, 65, 273-278.
4. P. Du, J. S. Yu, *Microchim. Acta.* **2018**, 185, 237.
5. X. Zhang, J. Yi, H. Chen, M. Mao, L. Liu, X. She, H. Ji, X. Wu, S. Yuan, H. Xu, H. Li, *J. Eng. Chem.* **2019**, 29, 65-71.
6. R. Adhikari, J. Choi, R. Narro-García, E. DelaRosa, T. Sekino, S. W. Lee, *J. Solid. State. Chem.* **2014**, 216, 36-41.
7. L. Zhou, P. Du, J. S. Yu, *J. Am. Ceram. Soc.* **2019**, 102, 5353-5364.
8. L. Wang, H. M. Noh, B. K. Moon, S. H. Park, K. H. Kim, J. Shi, J. H. Jeong, *J. Phys. Chem. C* **2015**, 119, 15517-15525.
